# Supplementary material for: The utility of physical activity questionnaires among African origin populations; lost in translation?
Source: PubMed Central journal article supplement (PMC11661415; doi:10.21203/rs.3.rs-5529358/v1), 2024-12-12
Supplement: NIHPPRS5529358V1-supplement-1.pdf [file NIHPPRS5529358V1-supplement-1.pdf]

## Supplementary Files

This is a list of supplementary files associated with this preprint. Click to download.

- [UtilityofPAQinMETSIJBNPAsupplementaryinformation.docx](#)
- [Tables.docx](#)
