# Supplementary material for: The utility of physical activity questionnaires among African origin populations; lost in translation?
Source: Research Square preprint supplement (doi:10.21203/rs.3.rs-5529358/v1), 2024-12-12
Supplement: Supplementary file 1 [file f1ccab284c2811c22c7c1398.docx]

# **The utility of physical activity questionnaires among African origin populations; lost in translation?**

Jessica C. Davies1, Candice Choo-Kang2, Larske Soepnel1, Hayli Geffen1, Asanda Mtintsilana1,Chad Africa1, Pascal Bovet3,4, Bharathi Viswanathan4, Kweku Bedu-Addo5, Jacob Plange-Rhule5Ψ, Prince Oti Boateng5, Kingsley Apusiga5, Oscar Akunor Dei5, Terrence E. Forrester6, Estelle V. Lambert7,11, Nandipha Sinyanya7, Brian T. Layden,8,9, Jack A. Gilbert10, Gertrude Ecklu-Mensah10, Cara Joyce2, Amy Luke2, Lara R. Dugas 1, 2

1Division of Epidemiology and Biostatistics, School of Public Health, Faculty of Health Sciences, University of Cape Town, Cape Town, South Africa

2 Public Health Sciences, Parkinson School of Health Sciences and Public Health, Loyola University Chicago, Maywood, IL, USA

3University Center for Primary Care and Public Health (Unisanté), Lausanne, Switzerland

4Ministry of Health, Victoria, Republic of Seychelles

5Department of Physiology, School of Medical Sciences, Kwame Nkrumah University of Science and Technology, Kumasi, Ghana

6Solutions for Developing Countries, University of the West Indies, Mona, Kingston, Jamaica

7Health through Physical Activity, Lifestyle and Sport Research Centre (HPALS), Department of Human Biology, Faculty of Health Sciences, University of Cape Town

8Department of Medicine, University of Illinois at Chicago, Chicago, Illinois, USA

9Jesse Brown Veterans Affairs Medical Center, Chicago, Illinois, USA

10Department of Pediatrics, Center for Microbiome Innovation, University of California San Diego, La Jolla, CA, USA

11School of Health and Medical Sciences, Faculty of Health, Engineering & Sciences, University of Southern Queensland, Australia

Corresponding Author: Jessica C. Davies; Division of Epidemiology and Biostatistics, School of Public Health, University of Cape Town, Cape Town, South Africa; [jess.davies@uct.ac.za](mailto:jess.davies@uct.ac.za)

ΨDeceased


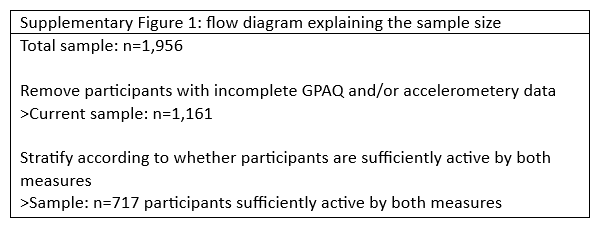


| Supplementary Table 1: 2x2 table of whether participants are sufficiently active or not, by obesity status (n = 1,161) | | | | |
| --- | --- | --- | --- | --- |
|  | Obese (n = 479) | | Not obese (n = 682) | |
|  | Meets WHO guideline of >=150min MVPA per week | Doesn’t meet WHO guideline of >=150min MVPA per week | Meets WHO guideline of >=150min MVPA per week | Doesn’t meet WHO guideline of >=150min MVPA per week |
| Meets GPAQ criteria >600 METmin/week | 49 (10.2) | 217 (45.3) | 224 (32.8) | 227 (33.3) |
| Doesn’t meet GPAQ criteria >600 METmin/week | 30 (6.3) | 183 (38.2) | 65 (9.5) | 166 (24.3) |
| Sensitivity | 0.62 (0.50, 0.73) | | 0.78 (0.72, 0.82) | |
| Specificity | 0.46 (0.41, 0.51) | | 0.42 (0.37, 0.47) | |
| *Data are presented as counts (percentage), sensitivity and specificity are presented with 95% confidence interval in brackets. WHO: World Health Organization; MVPA: moderate-to-vigorous intensity PA; GPAQ: global physical activity questionnaire.* | | | | |

| Supplementary Table 2: 2x2 tables of whether participants are sufficiently active or not, by site | | | | | | | | | | |
| --- | --- | --- | --- | --- | --- | --- | --- | --- | --- | --- |
|  | Ghana (n = 183) | | South Africa (n = 254) | | Jamaica (n = 238) | | Seychelles (n = 280) | | United States (n = 206) | |
|  | Meets WHO guideline of >=150min MVPA per week | Doesn’t meet WHO guideline of >=150min MVPA per week | Meets WHO guideline of >=150min MVPA per week | Doesn’t meet WHO guideline of >=150min MVPA per week | Meets WHO guideline of >=150min MVPA per week | Doesn’t meet WHO guideline of >=150min MVPA per week | Meets WHO guideline of >=150min MVPA per week | Doesn’t meet WHO guideline of >=150min MVPA per week | Meets WHO guideline of >=150min MVPA per week | Doesn’t meet WHO guideline of >=150min MVPA per week |
| Meets GPAQ criteria >600 METmin/week | 57 (31) | 83 (45) | 88 (35) | 72 (28) | 52 (22) | 83 (35) | 49 (17.5) | 106 (38) | 27 (13) | 100 (49) |
| Doesn’t meet GPAQ criteria >600 METmin/week | 7 (4) | 36 (20) | 30 (12) | 64 (25) | 20 (8) | 83 (35) | 34 (12) | 91 (32.5) | 4 (2) | 75 (36) |
| Sensitivity | 0.89 (0.79, 0.95) | | 0.75 (0.66, 0.82) | | 0.72 (0.60, 0.82) | | 0.59 (0.48, 0.70) | | 0.87 (0.70, 0.96) | |
| Specificity | 0.30 (0.22, 0.39) | | 0.47 (0.38, 0.56) | | 0.50 (0.42, 0.58) | | 0.46 (0.39, 0.53) | | 0.43 (0.35, 0.51) | |
| *Data are presented as counts (percentage), sensitivity and specificity are presented with 95% confidence interval in brackets. WHO: World Health Organization; MVPA: moderate-to-vigorous intensity PA; GPAQ: global physical activity questionnaire.* | | | | | | | | | | |

| Supplementary Table 3: 2x2 table of whether participants are sufficiently active or not, by sex (n = 1,161) | | | | |
| --- | --- | --- | --- | --- |
|  | Men (n = 450) | | Women (n = 711) | |
|  | Meets WHO guideline of >=150min MVPA per week | Doesn’t meet WHO guideline of >=150min MVPA per week | Meets WHO guideline of >=150min MVPA per week | Doesn’t meet WHO guideline of >=150min MVPA per week |
| Meets GPAQ criteria >600 METmin/week | 185 (41.1) | 140 (31.1) | 88 (12.4) | 304 (42.7) |
| Doesn’t meet GPAQ criteria >600 METmin/week | 49 (10.8) | 76 (16.8) | 46 (6.5) | 273 (38.4) |
| Sensitivity | 0.79 (0.73, 0.84) | | 0.66 (0.57, 0.74) | |
| Specificity | 0.35 (0.29, 0.42) | | 0.47 (0.43, 0.51) | |
| *Data are presented as counts (percentage), sensitivity and specificity are presented with 95% confidence interval in brackets. WHO: World Health Organization; MVPA: moderate-to-vigorous intensity PA; GPAQ: global physical activity questionnaire.* | | | | |

*
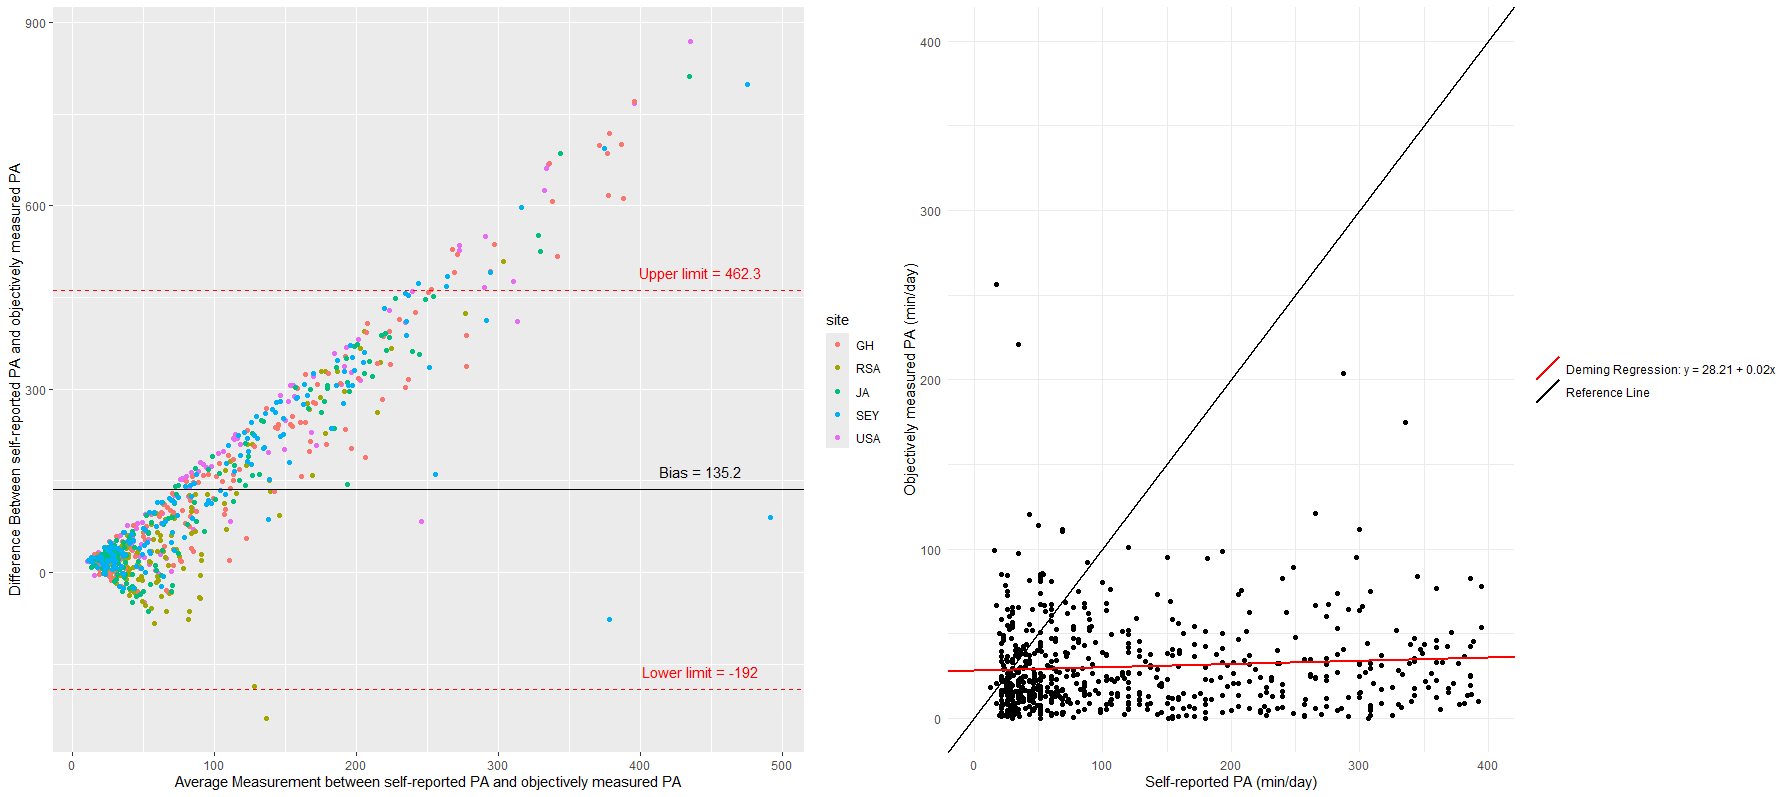
*

Supplementary Figure 2: Agreement between objectively measured and self-reported PA (n = 717)

Panel A: Bland-Altman plot showing the agreement between objectively measured and self-reported PA. The black line represents the bias (the mean difference between objective and self-reported values). The red lines indicate the limits of agreement (bias ±1.96 times the standard deviation of the differences). Each point represents an individual’s difference between objectively measured and self-reported PA, plotted against the average of the two measures.

*PA: physical activity; y = 28.21 + 0.02x: Deming regression formula.*
